# Supplementary material for: Spacing, Feedback, and Testing Boost Vocabulary Learning in a Web Application
Source: Front Psychol. 2021 Nov 15;12:757262. doi: 10.3389/fpsyg.2021.757262 (PMC8638698; doi:10.3389/fpsyg.2021.757262)
Supplement: Supplementary file 2 [file Table_1.XLS]

## Sheet: tab_supp1_anova_4lp_subsample_n
Table S1. ANOVA four learning principles in subsample (excluding the remote-tested participants)
Effect	df	MSE	F	pes	p.value
spacing	2, 60	4131.84	5.12 **	0.15	0.009
modality	1, 60	164.35	0.07	0.001	0.79
spacing:modality	2, 60	164.35	0.29	0.01	0.75
testing	1, 60	218.49	0.01	0.0001	0.93
spacing:testing	2, 60	218.49	0.66	0.02	0.52
feedback	1, 60	218.79	17.51 ***	0.23	<.0001
spacing:feedback	2, 60	218.79	2.96	0.09	0.06
modality:testing	1, 60	82.47	0.04	0.0007	0.84
modality:feedback	1, 60	118.53	3.05	0.05	0.09
testing:feedback	1, 60	195.28	9.87 **	0.14	0.003
Note. df = degrees of freedom, MSE = mean squared error, pes = partial eta squared
