# Supplementary material for: Spacing, Feedback, and Testing Boost Vocabulary Learning in a Web Application
Source: Front Psychol. 2021 Nov 15;12:757262. doi: 10.3389/fpsyg.2021.757262 (PMC8638698; doi:10.3389/fpsyg.2021.757262)
Supplement: Supplementary file 3 [file Table_2.xls]

## Sheet: tab_supp_6_anova_6lp_and_direct
Table S2. ANOVA four learning principles, learning direction, and test direction
Effect	df	MSE	F	pes	p.value
spacing	2, 76	16572.3	8.51 ***	0.18	0.0005
feedback	1, 76	819.94	21.38 ***	0.22	<.0001
spacing:feedback	2, 76	819.94	3.11	0.08	0.05
testing	1, 76	743.09	0.31	0.004	0.58
spacing:testing	2, 76	743.09	1.85	0.05	0.16
modality	1, 76	624.05	0.26	0.003	0.61
spacing:modality	2, 76	624.05	0.5	0.01	0.61
learning_direction	1, 76	868.8	28.61 ***	0.27	<.0001
test_direction	1, 76	867.87	233.38 ***	0.75	<.0001
feedback:testing	1, 76	715.17	14.12 ***	0.16	0.0003
feedback:modality	1, 76	502.69	2.83	0.04	0.1
testing:modality	1, 76	349.84	0.37	0.005	0.54
learning_direction:test_direction	1, 76	568.52	105.74 ***	0.58	<.0001
Note. df = degrees of freedom, MSE = mean squared error, pes = partial eta squared
